# Supplementary material
Source: publisher figshare collection journal article supplement (https://asha.figshare.com/ndownloader/files/17431235)
Supplement: Supplementary file 1 [file 17431235]

## Sheet: 8 points-XYZ
Points for curvature calculation
Subj1	X	Y	Z	Label #	Group 1
1	5.9175	114.011	-7.743	25
2	6.1656	112.103	-2.1347	25
3	5.7619	106.49	-0.2653	25
4	5.0322	99.0258	-0.2653	25
5	4.485	93.4275	-0.2653	25
6	4.0813	87.8152	1.6042	25
7	3.6776	82.2028	3.4736	25
8	3.1304	76.6045	3.4736	25
Subj2	X	Y	Z	Label #	Group 2
1	25.681	111.205	-3.8185	25
2	25.2381	107.476	-0.0741	25
3	24.4728	101.9	3.6703	25
4	23.6064	96.3407	5.5425	25
5	22.4174	88.9348	7.4147	25
6	21.1273	81.5466	7.4147	25
7	19.8372	74.1584	7.4147	25
8	18.7686	68.6349	5.5425	25
Subj3	X	Y	Z	Label #	Group 2
1	2.3884	100.152	7.0385	25
2	2.4052	94.5214	10.7794	25
3	2.2915	88.896	12.6498	25
4	2.1779	83.2706	14.5203	25
5	1.983	75.772	16.3907	25
6	1.7389	70.1523	16.3907	25
7	1.4949	64.5326	16.3907	25
8	1.1205	58.9186	14.5203	25
Subj4	X	Y	Z	Label #	Group 1
1	4.6617	106.383	11.0258	25
2	4.2532	100.772	12.9003	25
3	3.8448	95.1622	14.7748	25
4	3.3937	89.5553	14.7748	25
5	2.9426	83.9484	14.7749	25
6	2.4916	78.3415	14.7749	25
7	2.0405	72.7346	14.7749	25
8	1.6972	69.0001	12.9003	25
subj5	X	Y	Z	Label #	Group 1
1	-0.8568	100.055	8.0326	25
2	-0.5715	96.3041	11.771	25
3	-0.291	90.6784	15.5094	25
4	-0.3103	83.1784	15.5094	25
5	-0.3248	77.5534	15.5094	25
6	-0.1918	71.928	17.3785	25
7	-0.0589	66.3027	19.2477	25
8	-0.0782	58.8027	19.2477	25
subj6	X	Y	Z	Label #	Group 1
1	9.5831	106.803	7.3474	25
2	9.2659	101.186	9.2219	25
3	8.8571	93.6975	11.0964	25
4	8.4483	86.2086	12.9709	25
5	8.0885	80.5944	16.72	25
6	7.6797	73.1055	18.5945	25
7	7.4051	67.4872	18.5945	25
8	7.0814	59.994	16.72	25
subj7	X	Y	Z	Label #	Group 1
1	3.1191	111.62	2.3895	25
2	2.9092	105.999	4.2643	25
3	2.7254	100.377	8.0139	25
4	2.4629	92.881	11.7635	25
5	2.1217	83.5121	15.5132	25
6	1.9118	77.8909	17.388	25
7	1.597	70.3975	17.388	25
8	1.3609	64.7775	17.388	25
subj8	X	Y	Z	Label #	Group 1
1	6.9592	108.832	2.8759	25
2	6.7816	103.209	6.6247	25
3	6.5551	97.5885	8.499	25
4	6.3286	91.9678	10.3734	25
5	6.151	86.3448	14.1221	25
6	5.9245	80.7241	15.9965	25
7	5.698	75.1035	17.8708	25
8	5.4227	69.4852	17.8708	25
subj9	X	Y	Z	Label #	Group 1
1	9.5471	108.215	3.941	25
2	9.3503	104.469	7.6907	25
3	9.1535	100.724	11.4405	25
4	8.8127	95.1097	13.3153	25
5	8.4719	89.495	15.1902	25
6	8.1083	83.8817	15.1902	25
7	7.7448	78.2685	15.1902	25
8	7.3812	72.6553	15.1902	25
subj10	X	Y	Z	Label #	Group 2
1	-7.2311	95.3171	2.5081	25
2	-6.6649	89.712	6.2452	25
3	-5.9431	84.114	11.8507	25
4	-5.3769	78.5089	15.5878	25
5	-4.8107	72.9038	19.3248	25
6	-4.4001	67.2917	21.1933	25
7	-3.9894	61.6795	23.0619	25
8	-3.7344	56.0603	23.0619	25
subj11	X	Y	Z	Label #	Group 1
1	-2.1266	103.648	2.1829	25
2	-1.6955	98.0397	5.9327	25
3	-1.1724	90.5579	5.9327	25
4	-0.6685	83.0748	4.0578	25
5	-0.1454	75.5931	4.0578	25
6	0.247	69.9818	4.0578	25
7	0.6394	64.3705	4.0578	25
8	1.0124	58.7579	2.1829	25
subj12	X	Y	Z	Label #	Group 2
1	-5.2841	118.412	-16.5033	25
2	-4.9357	114.669	-12.7625	25
3	-4.5873	110.926	-9.0217	25
4	-4.3268	105.306	-7.1513	25
5	-4.0232	97.8108	-5.2809	25
6	-3.8938	92.1873	-5.2808	25
7	-3.7644	86.5638	-5.2808	25
8	-3.7661	80.9372	-7.1513	25
subj13	X	Y	Z	Label #	Group 2
1	7.8335	103.902	-7.3036	25
2	7.64	100.156	-1.6788	25
3	7.1879	92.6698	2.0711	25
4	6.8733	87.0534	7.6959	25
5	6.405	79.568	9.5708	25
6	5.9367	72.0826	11.4457	25
7	5.4522	64.5983	11.4457	25
8	4.9514	57.115	9.5708	25
subj14	X	Y	Z	Label #	Group 1
1	-0.5109	107.51	5.4146	25
2	-0.2576	103.767	9.1634	25
3	0.0248	98.1493	11.0377	25
4	0.356	92.5332	14.7865	25
5	0.6385	86.9151	16.6608	25
6	0.9209	81.297	18.5352	25
7	1.1546	75.6768	18.5352	25
8	1.3396	70.0547	16.6608	25
subj15	X	Y	Z	Label #	Group 1
1	8.4596	116.608	0.289	25
2	8.2971	109.106	4.0311	25
3	7.8929	101.617	4.0311	25
4	7.3876	92.2551	4.0311	25
5	6.9021	81.015	5.9022	25
6	6.3968	71.6536	5.9022	25
7	5.8718	64.171	4.0311	25
8	5.3269	58.5672	0.289	25
subj16	X	Y	Z	Label #	Group 1
1	0.9647	98.0658	10.836	25
2	1.0441	94.3131	14.5824	25
3	0.917	88.6895	14.5824	25
4	0.7899	83.0659	14.5824	25
5	0.6627	77.4424	14.5824	25
6	0.5356	71.8188	14.5824	25
7	0.4085	66.1952	14.5824	25
8	0.1992	60.5735	12.7092	25
subj17	X	Y	Z	Label #	Group 2
1	12.1011	104.19	5.2726	25
2	11.6941	100.455	9.0147	25
3	11.3253	94.8405	10.8858	25
4	10.9565	89.2263	12.7569	25
5	10.7086	83.6067	12.7569	25
6	10.5816	77.9819	10.8858	25
7	10.3337	72.3623	10.8858	25
8	10.2066	66.7375	9.0147	25
subj18	X	Y	Z	Label #	Group 2
1	3.4609	140.532	13.0519	25
2	3.9145	134.919	16.7937	25
3	4.1888	127.424	16.7937	25
4	4.4631	119.93	16.7937	25
5	4.6134	112.43	14.9228	25
6	4.8877	104.935	14.9228	25
7	5.1619	97.44	14.9228	25
8	5.2437	91.8142	13.0519	25
subj19	X	Y	Z	Label #	Group 1
1	2.5645	126.685	0.0436	25
2	3.0135	121.078	0.0436	25
3	3.3825	115.464	1.9169	25
4	3.7514	109.851	3.7901	25
5	4.1203	104.237	5.6634	25
6	4.4892	98.6237	7.5367	25
7	4.9382	93.0167	7.5367	25
8	5.3873	87.4096	7.5367	25
subj20	X	Y	Z	Label #	Group 2
1	4.8697	111.148	5.6784	25
2	5.1658	109.25	13.1668	25
3	5.2362	105.488	18.783	25
4	4.9597	97.99	22.5272	25
5	4.7	92.37	24.3993	25
6	4.2147	84.8858	24.3993	25
7	3.7294	77.4015	24.3993	25
8	3.2441	69.9172	24.3993	25
